# Supplementary material
Source: PubMed Central journal article supplement (PMC5363192)
Supplement: mmc1.pdf [file mmc1.pdf]

**YMTHE, Volume 25**

**Supplemental Information**

**Antisense Reduction of Mutant COMP Reduces  
Growth Plate Chondrocyte Pathology**

**Karen L. Posey, Francoise Coustry, Alka C. Veerisetty, Mohammad Hossain, Danielle Gattis, Sheri Booten, Joseph L. Alcorn, Punit P. Seth, and Jacqueline T. Hecht**

**Supplemental Table 1: Liver enzyme levels**

| <b>Treatment</b> | <b>ALB</b> | <b>ALT</b> | <b>AST</b>    | <b>T.BIL</b> | <b>CREAT</b> | <b>BUN</b> |
|------------------|------------|------------|---------------|--------------|--------------|------------|
| PBS              | 2.92 ±     | 48.75 ±    | 91.25 ± 37.20 | 0.23 ±       | 0.18 ±       | 24.20 ±    |
|                  | 0.50       | 25.32      |               | 0.24         | 0.03         | 5.55       |
| ASO              | 3.03 ±     | 33.50 ±    | 106.75 ±      | 0.25 ±       | 0.20 ±       | 18.00 ±    |
|                  | 0.60       | 11.56      | 42.43         | 0.19         | 0.04         | 2.62       |

Albumin (ALB), aminotransferase (ALT), aspartate aminotransferase (AST), total bilirubin (T.Bil), creatinine (CREAT) and blood urea nitrogen (BUN).
